# Supplementary material
Source: PubMed Central journal article supplement (PMC7543717)
Supplement: ry192828suppa1.pdf [file ry192828suppa1.pdf]

**Table E1: Summary of qualitative scoring using the five point scale described in the methods section (1 = definitely normal, 2 = probably normal, 3 = equivocal, 4 = probably abnormal, and 5 = definitely abnormal)**

| Participant | Reader 1 score | Reader 2 score |
|-------------|----------------|----------------|
| 1           | 1              | 1              |
| 2           | 1              | 1              |
| 3           | 2              | 3              |
| 4           | 5              | 5              |
| 5           | 3              | 3              |
| 6           | 1              | 1              |
| 7           | 2              | 4              |
| 8           | 5              | 5              |
| 9           | 2              | 2              |
| 10          | 2              | 4              |
| 11          | 4              | 5              |
| 12          | 3              | 3              |
| 13          | 2              | 1              |
| 14          | 5              | 5              |
| 15          | 2              | 4              |
| 16          | 2              | 2              |
| 17          | 2              | 4              |
| 18          | 5              | 5              |
| 19          | 1              | 1              |
| 20          | 2              | 2              |
| 21          | 3              | 5              |
| 22          | 3              | 4              |
| 23          | 5              | 5              |
| 24          | 1              | 1              |

Lesions scored 4 or 5 were documented as suspicious. Only those foci qualitatively scored as suspicious by both readers were considered suspicious foci and considered for biopsy. Beyond the 5-point scale, the protocol did not specify what is abnormal. Reader one was considering uptake above blood pool background to be abnormal, while reader two considered uptake above local background to be abnormal. The former was a higher threshold to call an abnormality, and thus would increase specificity, while the later would increase sensitivity.

**Table E2: Additional data retrospectively evaluated after completion of the prospective study**

| Participant | Site of most <sup>89</sup> Zr-pertuzumab avid lesion | Size of most <sup>89</sup> Zr-pertuzumab avid lesion (cm) | Corresponding FDG SUVmax of most <sup>89</sup> Zr-pertuzumab avid lesion | <sup>89</sup> Zr-pertuzumab SUVmax of most <sup>89</sup> Zr-pertuzumab avid lesion | SUVmax of <sup>89</sup> Zr-pertuzumab local background | SUVmax of <sup>89</sup> Zr-pertuzumab blood pool background | <sup>89</sup> Zr-pertuzumab lesion to local background ratio | <sup>89</sup> Zr-pertuzumab lesion to blood pool background ratio |
|-------------|------------------------------------------------------|-----------------------------------------------------------|--------------------------------------------------------------------------|------------------------------------------------------------------------------------|--------------------------------------------------------|-------------------------------------------------------------|--------------------------------------------------------------|-------------------------------------------------------------------|
| 1           | Liver                                                | 2.6                                                       | na                                                                       | 6.6                                                                                | 6.7                                                    | 6.4                                                         | 1.0                                                          | 1.0                                                               |
| 2           | Node (mediastinal)                                   | 3.9                                                       | na                                                                       | 5.0                                                                                | 5.7                                                    | 7.5                                                         | 0.9                                                          | 0.7                                                               |
| 3           | Bone (sacrum)                                        | nm                                                        | 13.6                                                                     | 5.7                                                                                | 5.5                                                    | 8.2                                                         | 1.0                                                          | 0.7                                                               |
| 4           | Bone (spine)                                         | nm                                                        | na                                                                       | 13.6                                                                               | 3.5                                                    | 6.0                                                         | 3.9                                                          | 2.3                                                               |
| 5           | Liver                                                | 1.0                                                       | na                                                                       | 8.2                                                                                | 8.4                                                    | 8.2                                                         | 1.0                                                          | 1.0                                                               |
| 6           | Pleura                                               | nm                                                        | 5.5                                                                      | 3.0                                                                                | 3.0                                                    | 5.6                                                         | 0.5                                                          | 0.5                                                               |
| 7           | Node (axillary)                                      | 2.1                                                       | na                                                                       | 2.9                                                                                | 1.5                                                    | 4.8                                                         | 1.9                                                          | 0.6                                                               |
| 8           | Bone (ilium)                                         | nm                                                        | 6.6                                                                      | 52.0                                                                               | 5.5                                                    | 13.5                                                        | 9.5                                                          | 3.9                                                               |
| 9           | Pleura                                               | 1.9                                                       | 7.4                                                                      | 9.9                                                                                | 5.9                                                    | 11.8                                                        | 1.7                                                          | 0.9                                                               |
| 10          | Bone (clavicle)                                      | nm                                                        | 2.7                                                                      | 3.1                                                                                | 1.3                                                    | 4.3                                                         | 2.1                                                          | 0.6                                                               |
| 11          | Node (Mediastinal)                                   | 0.9                                                       | na                                                                       | 7.7                                                                                | 2.9                                                    | 6.7                                                         | 2.6                                                          | 1.1                                                               |
| 12          | Chest wall                                           | 3.6                                                       | na                                                                       | 5.8                                                                                | 5.0                                                    | 7.0                                                         | 1.2                                                          | 0.8                                                               |
| 13          | Breast                                               | 2.4                                                       | na                                                                       | 1.4                                                                                | 1.3                                                    | 7.2                                                         | 1.1                                                          | 0.2                                                               |
| 14          | Liver                                                | 3.9                                                       | na                                                                       | 28.1                                                                               | 7.7                                                    | 7.8                                                         | 3.6                                                          | 3.6                                                               |
| 15          | Bone (ilium)                                         | nm                                                        | na                                                                       | 11.4                                                                               | 5.3                                                    | 13.0                                                        | 2.1                                                          | 0.9                                                               |
| 16          | Bone (spine)                                         | nm                                                        | 5.8                                                                      | 8.3                                                                                | 6.7                                                    | 14.5                                                        | 1.2                                                          | 0.6                                                               |
| 17          | Bone (spine)                                         | nm                                                        | 7.7                                                                      | 6.5                                                                                | 6.3                                                    | 10.6                                                        | 1.0                                                          | 0.6                                                               |
| 18          | Bone (femur)                                         | nm                                                        | 7.5                                                                      | 17.3                                                                               | 5.3                                                    | 8.0                                                         | 3.3                                                          | 2.2                                                               |
| 19          | Liver                                                | 2.4                                                       | na                                                                       | 9.0                                                                                | 9.8                                                    | 9.8                                                         | 0.9                                                          | 0.9                                                               |
| 20          | Node (supraclav)                                     | 1.7                                                       | 8.6                                                                      | 10.8                                                                               | 9.3                                                    | 12.6                                                        | 1.2                                                          | 0.9                                                               |
| 21          | Lung                                                 | 1.6                                                       | 6.4                                                                      | 6.1                                                                                | 2.0                                                    | 7.9                                                         | 3.0                                                          | 0.8                                                               |
| 22          | Breast                                               | 3.2                                                       | na                                                                       | 6.4                                                                                | 1.9                                                    | 7.5                                                         | 3.4                                                          | 0.8                                                               |
| 23          | Bone (ilium)                                         | Not measurable                                            | 4.5                                                                      | 13.8                                                                               | 2.5                                                    | 8.2                                                         | 5.5                                                          | 2.5                                                               |
| 24          | Liver                                                | 1.6                                                       | 6.2                                                                      | 11.3                                                                               | 11.2                                                   | 10.9                                                        | 1.0                                                          | 1.0                                                               |

Size of the most <sup>89</sup>Zr-pertuzumab avid lesion was measured in long axis, bone lesions were not measured. Corresponding FDG SUVmax was collected if the participant had an FDG PET/CT within 6 weeks prior to trial enrollment. SUVs for the most <sup>89</sup>Zr-pertuzumab avid lesion, local background, and blood pool background allowed for calculations of lesion-to-local background and lesion-to-blood pool background ratios. nm = not measurable for size. na = no available FDG PET/CT within 6 weeks of protocol enrollment.
